# Supplementary material
Source: PubMed Central journal article supplement (PMC2728986)
Supplement: 0900711106_0900711106SI.pdf [file 0900711106_0900711106SI.pdf]

# Supporting Information

Choy et al. 10.1073/pnas.09007111106

**Table S1. Total mercury values (mean ± SD) of prey taxa from Hawaiian waters measured in this study**

| Taxonomic group                                       | <i>n</i> | Size, mm   | Depth category | Ref(s). | Day-time depth range, m | THg, μg/kg     |
|-------------------------------------------------------|----------|------------|----------------|---------|-------------------------|----------------|
| Mixed Zooplankton                                     | 5        | 1–2        | epi            | 1       | 0–200                   | 2.26 ± 3.23    |
| Invertebrates                                         |          |            |                |         |                         |                |
| Phylum Ctenophora                                     |          |            |                |         |                         |                |
| Ctenophores (unidentified)                            | 3        | 20–30 TL   | other          | 2       | 0–600                   | 0.00 ± 0.00    |
| Phylum Chordata, Subphylum Tunicata                   |          |            |                |         |                         |                |
| Class Thaliacea                                       |          |            |                |         |                         |                |
| Pyrosomes (unidentified)                              | 2 (8)    | 14–36 TL   | upmeso.dvm     | 2, 3    | 400–600+                | 3.49 ± 4.94    |
| Salps (unidentified)                                  | 3 (7)    | 200–400 TL | upmeso.dvm     | 2, 4    | 400–600+                | 0.00 ± 0.00    |
| Phylum Arthropoda                                     |          |            |                |         |                         |                |
| Subphylum Crustacea                                   |          |            |                |         |                         |                |
| Order Amphipoda                                       |          |            |                |         |                         |                |
| <i>Phronima</i> sp.                                   | 2 (6)    | 17–23 TL   | lomeso.dvm     | 5, 6    | 400–975                 | 0.00 ± 0.00    |
| Order Decapoda                                        |          |            |                |         |                         |                |
| Crab Megalopae (unidentified)                         | 3 (14)   | 3–14 CL    | epi            | 7, 8    | 0–200                   | 0.94 ± 1.63    |
| <i>Janicella spinacauda</i>                           | 7 (10)   | 7–16 CL    | upmeso.dvm     | 9       | 500–600                 | 30.39 ± 23.82  |
| Lobster Phyllosoma (unidentified)                     | 5        | 42–67 CL   | upmeso.dvm     | 10      | 80–400                  | 18.54 ± 13.61  |
| <i>Oplophorus gracilirostris</i>                      | 5        | 9–20 CL    | upmeso.dvm     | 9, 11   | 500–650                 | 90.23 ± 103.20 |
| <i>Sergestes</i> sp.                                  | 5        | 8–25 CL    | upmeso.dvm     | 12, 13  | 200–600                 | 45.61 ± 51.29  |
| <i>Sergia</i> sp.                                     | 5        | 6–10 CL    | upmeso.dvm     | 12, 13  | 300–600                 | 0.45 ± 1.01    |
| <i>Systemlipsis</i> sp.                               | 5        | 5–44 CL    | lomeso.dvm     | 9, 12   | 600–1100                | 22.63 ± 38.18  |
| Order Euphausiacea                                    |          |            |                |         |                         |                |
| Euphausiids (unidentified)                            | 2 (7)    | 5–7 CL     | upmeso.dvm     | 14, 15  | 400–600                 | 7.72 ± 10.92   |
| Order Isopoda                                         |          |            |                |         |                         |                |
| <i>Anuropus</i> sp.                                   | 1        | 16.6 TL    | upmeso.perm    | 16, 17  | 200–800                 | 52.83          |
| Order Lophogastrida                                   |          |            |                |         |                         |                |
| <i>Lophogaster</i> sp.                                | 4        | 7–11 CL    | epi            | 2       | 0–200                   | 1.11 ± 1.70    |
| Order Stomatopoda                                     |          |            |                |         |                         |                |
| Stomatopods (J) (unidentified)                        | 5 (13)   | 6–26 CL    | epi            | 18      | 0–150                   | 0.00 ± 0.00    |
| Phylum Mollusca                                       |          |            |                |         |                         |                |
| Class Cephalopoda                                     |          |            |                |         |                         |                |
| <i>Abralia trignonura</i>                             | 4        | 27–33 ML   | upmeso.dvm     | 19, 20  | 450–650                 | 22.82 ± 6.17   |
| <i>Abraliopsis pacificus</i>                          | 2        | 30–33 ML   | upmeso.dvm     | 19, 21  | 500–600                 | 12.96 ± 4.91   |
| <i>Abraliopsis</i> sp. A                              | 5        | 17–35 ML   | upmeso.dvm     | 19, 21  | 500–700                 | 12.39 ± 10.54  |
| <i>Hyaloteuthis pelagicus</i>                         | 9        | 22–56 ML   | epi            | 22, 23  | 0–200                   | 1.39 ± 2.44    |
| <i>Onychoteuthis</i> sp.                              | 5        | 20–29 ML   | lomeso.dvm     | 20      | 400–1000                | 20.73 ± 37.30  |
| <i>Sthenoteuthis oualaniensis</i>                     | 3        | 194–210 ML | lomeso.dvm     | 20, 22  | 500–1000                | 50.13 ± 20.35  |
| Class Gastropoda                                      |          |            |                |         |                         |                |
| Thecosome pteropods (unidentified)                    | 1 (9)    | 6–10 TL    | upmeso.dvm     | 24      | 300+                    | 57.45          |
| Heteropods (unidentified)                             | 4 (12)   | 10–20 TL   | epi            | 25, 26  | 0–140                   | 12.64 ± 14.66  |
| Fishes                                                |          |            |                |         |                         |                |
| Class Actinopterygii, Infraclass Teleostei            |          |            |                |         |                         |                |
| Family Alepisauridae - <i>Alepisaurus ferox</i>       | 2        | 375–465 SL | upmeso.perm    | 27, 28  | 0–1000+                 | 30.45 ± 38.09  |
| Family Berycidae - <i>Beryx splendens</i>             | 5        | 169–225 SL | upmeso.perm    | 29, 30  | 200–800+                | 223.00 ± 74.62 |
| Family Bramidae (J)                                   | 3        | 18–40 SL   | epi            | 31, 32  | 0–50                    | 0.90 ± 1.56    |
| Family Bregmacerotidae - <i>Bregmaceros</i> sp.       | 3        | 65–70 SL   | lomeso.dvm     | 33      | 600–800                 | 32.07 ± 13.14  |
| Family Carangidae (J)                                 | 5        | 30–61 SL   | epi            | 31, 32  | 0–50                    | 0.29 ± 0.45    |
| Family Chaetodonidae - <i>Chaetodon</i> sp. (J)       | 5 (9)    | 15–26 SL   | epi            | 31, 32  | 0–50                    | 24.94 ± 28.53  |
| Family Chiasmodontidae                                | 4        | 40–69 SL   | lomeso.perm    | 2       | 600+                    | 22.95 ± 10.46  |
| Family Congridae - Leptocephalus larvae               | 1 (5)    | 56–66 TL   | epi            | 34, 35  | 80–200                  | 0.00           |
| Family Engraulidae - <i>Encrasicholina purpurea</i>   | 4 (12)   | 50–63 SL   | epi            | 36      | 0–100                   | 7.15 ± 1.52    |
| Family Exocoetidae - <i>Exocoetus</i> sp.             | 3        | 53–65 SL   | epi            | 37      | 0–50                    | 28.90 ± 19.82  |
| Family Gempylidae - <i>Gempylus serpens</i>           | 2        | 49–186 TL  | epi            | 33, 38  | 0–200                   | 1.46 ± 2.07    |
| <i>Nealotus tripes</i>                                | 6        | 29–71 SL   | epi            | 33, 38  | 50–250                  | 0.00 ± 0.00    |
| Family Gonostamidae - <i>Cyclothone</i> sp.           | 4 (12)   | 35–50 TL   | upmeso.perm    | 15, 39  | 400–600                 | 34.85 ± 12.46  |
| <i>Sigmops ebelingi</i>                               | 5        | 107–121 TL | lomeso.dvm     | 39      | 520–700                 | 21.15 ± 10.16  |
| Family Hemiramphidae - <i>Euleptorhamphus viridis</i> | 3 (4)    | 129–230 SL | epi            | 37      | 0–50                    | 27.56 ± 3.64   |
| Family Howellidae - <i>Howella brodiei brodiei</i>    | 4        | 19–51 SL   | upmeso.perm    | 2       | 400–600+                | 5.00 ± 5.89    |
| Family Molidae - <i>Ranzania laevis</i> (J)           | 1        | 122 SL     | epi            | 34, 40  | 0–200                   | 14.07          |
| Family Myctophidae - <i>Bolinichthys distofax</i>     | 2        | 87–88 SL   | lomeso.perm    | 41      | 500–700                 | 195.85 ± 31.08 |
| <i>Bolinichthys longipes</i>                          | 5        | 32–42 SL   | lomeso.dvm     | 41, 42  | 525–725                 | 21.27 ± 13.85  |
| <i>Ceratoscopelus warmingii</i>                       | 6        | 53–78 SL   | lomeso.dvm     | 41      | 600–1000                | 7.05 ± 13.34   |

| Taxonomic group                                                  | n      | Size, mm   | Depth category | Ref(s). | Day-time depth range, m | THg, $\mu\text{g/kg}$ |
|------------------------------------------------------------------|--------|------------|----------------|---------|-------------------------|-----------------------|
| <i>Diaphus perspicillatus</i>                                    | 5      | 48–55 SL   | lomeso.dvm     | 41      | 300–1000                | 80.36 $\pm$ 34.72     |
| <i>Lampanyctus niger</i>                                         | 5      | 51–77 SL   | lomeso.dvm     | 41, 42  | 640–900                 | 31.37 $\pm$ 33.66     |
| <i>Lampanyctus nobilis</i>                                       | 5      | 41–77 SL   | lomeso.dvm     | 41, 42  | 590–1200                | 9.39 $\pm$ 4.36       |
| Family Opisthoproctidae - <i>Opisthoproctus</i> sp.              | 3      | 63–69 SL   | upmeso.perm    | 33      | 400–725                 | 46.00 $\pm$ 10.21     |
| Family Paralepididae - <i>Lestidium</i> sp.                      | 5      | 60–141 SL  | epi            | 43      | 0–200                   | 3.82 $\pm$ 4.07       |
| Family Phosichthyidae - <i>Vinciguerria</i> sp.                  | 5 (10) | 26–31 SL   | upmeso.dvm     | 44      | 400–600                 | 4.04 $\pm$ 2.66       |
| Family Scombrabolabracidae - <i>Scombrabolabrax heterolepsis</i> | 1      | 69 SL      | lomeso.dvm     | 33, 37  | 750–1000                | 44.22                 |
| Family Serrivomeridae - <i>Serrivomer</i> sp.                    | 5      | 24–45 JL   | lomeso.dvm     | 2, 37   | 500–1000                | 37.81 $\pm$ 15.41     |
| Family Sternoptychidae - <i>Argyropelacus</i> sp.                | 5      | 41–59 SL   | upmeso.perm    | 42, 45  | 200–600                 | 23.37 $\pm$ 8.74      |
| <i>Sternoptyx</i> sp.                                            | 6      | 19–33 SL   | lomeso.perm    | 42, 45  | 500–1000                | 9.40 $\pm$ 10.18      |
| Family Stomiidae - Idiacanthinae                                 | 5      | 225–300 TL | lomeso.dvm     | 44      | 600–800                 | 29.98 $\pm$ 18.52     |
| <i>Malacosteus niger</i>                                         | 5      | 53–83 SL   | lomeso.dvm     | 44      | 500–900                 | 34.17 $\pm$ 9.11      |
| Family Tetraodontidae (J)                                        | 3      | 5–10 SL    | epi            | 31, 32  | 0–50                    | 6.27 $\pm$ 10.86      |

(J) indicates that the juvenile form of the organism was sampled. Also included are sample size (where numbers in parentheses indicate total pooled individuals), organism size (where TL is total length, CL is carapace length, ML is mantle length, SL is standard length, and JL is jaw length), and assigned ecological depth category (where epi is epipelagic, upmeso.dvm is upper mesopelagic migrant, upmeso.perm is upper mesopelagic nonmigrant, lomeso.dvm is lower mesopelagic migrant, lomeso.perm is lower mesopelagic nonmigrant—see *Results* and *Discussion* section of text for details) with referenced literature. Referenced day-time depths of occurrence (m) are also included.

- Hannides, C.C.S. 2007. Seasonal, interannual and decadal variation in zooplankton community structure and function in the North Pacific subtropical gyre. Ph.D. Thesis, Oceanography. University of Hawaii, Honolulu, HI. 353 pages;
- Maynard, S.D., Riggs, F.V. and C.F. Walters. 1975. Mesopelagic micronekton in Hawaiian waters: Faunal composition, standing stock, and diel vertical migration. *Fishery Bulletin* 73(4): 726–736;
- Van Soest, R.W.M. 1981. A monograph of the order pyrosomatida (Tunicata, Thaliacea). *Journal of Plankton Research* 3(4): 603–631;
- Harbison, G.R. and R.B. Campenot. 1979. Effects of temperature on the swimming of salps (Tunicata, Thaliacea): Implications for vertical migration. *Limnology and Oceanography* 24(6): 1081–1091;
- Brusca, G.J. 1973. Pelagic amphipoda from the waters near Oahu, Hawaii, excluding the family Scinidae. *Pacific Science* 27(1): 8–27;
- Shulenberg, E. 1979. Distributional pattern and niche separation among North Pacific hyperiid amphipods. *Deep Sea Research* 26(3A): 293–315;
- Forward Jr., R.B. and D. Rittschof. 1994. Photoresponses of crab megalopae in offshore and estuarine waters: implications for transport. *Journal of Experimental Biology and Ecology* 182(2): 183–192;
- Hasek, B.E. and N.N. Rabalais. 2001. A comparison of molt states of blue crab megalopae, *Callinectes sapidus* (Rathbun), sampled with artificial collectors and plankton nets. *Journal of Experimental Biology and Ecology* 265(1): 15–27;
- Ziemann, D.A. 1975. Patterns of vertical distribution, vertical migration, and reproduction in the Hawaiian mesopelagic shrimp of the family Ophrophoridae. Ph.D. Thesis, Oceanography. University of Hawaii, Honolulu, HI;
- Minami, H., Inoue, N. and H. Sekiguchi. 2001. Vertical distributions of phyllosoma larvae of palinurid and scyllarid lobsters in the Western North Pacific. *Journal of Oceanography* 57(6): 743–748;
- Grubbs, R.D., Holland, K. and D. Itano. 2002. Comparative trophic ecology of yellowfin and bigeye tuna associated with natural and man-made aggregation sites in Hawaiian waters. 15<sup>th</sup> Meeting of the Standing Committee on Tuna & Billfish (SCTB 15) working paper, YFT-6;
- Omori, M. 1974. The biology of pelagic shrimps in the ocean. *Advances in Marine Biology* 12: 233–324;
- Walters, J.F. 1976. Ecology of Hawaiian sergestid shrimps (Penaeidea: Sergestidae). *Fishery Bulletin* 74(4): 799–836;
- Mauchline, J. 1980. The biology of mysids and euphausiids. *Advances in Marine Biology* 18: 1–681;
- Brodeur, R. and O. Yamamura. 2005. Micronekton of the North Pacific, p. 1–115, PICES Scientific Report No. 30;
- Childress, J.J. 1975. The respiratory rates of midwater crustaceans as a function of depth of occurrence and relation to the oxygen minimum layer off Southern California. *Comparative Biochemistry and Physiology* 50A: 787–789;
- Saito, N., Kurata, Y. and M. Moku. 2002. Note on a meso-bathypelagic isopodean genus anuropus (Crustacea: Isopoda: Anuropidae) collected in the Western North Pacific off Northern Honshu, Japan. *Bulletin of the Plankton Society of Japan* 49(2): 88–94;
- Ahyong, S.T. 2002. A new species and new records of stomatopoda from Hawaii. *Crustaceana* 75(6): 827–840;
- Roper, C.F.E. and R.E. Young 1975. Vertical distribution of pelagic cephalopods. *Smithsonian Contributions to Zoology* 209: 1–51;
- Young, R.E. 1978. Vertical distribution and photosensitive vesicles of pelagic cephalopods from Hawaiian waters. *Fishery Bulletin* 76(3): 583–615;
- Young, R.E. 1995. Aspects of the natural history of pelagic cephalopods of the Hawaiian mesopelagic-boundary region. *Pacific Science* 49(2): 143–155;
- Clarke, M. R. 1966. Review of the systematics and ecology of oceanic squids. *Advances in Marine Biology* 4: 91–300;
- Cherrel, Y., Sabatie, R., Potier, M., Marsac, F., and F. Menard. 2007. New information from fish diets on the importance of glassy flying squid (*Hyaloteuthis pelagica*) (Teuthoidea: Ommastrephidae) in the epipelagic cephalopod community of the tropical Atlantic Ocean. *Fishery Bulletin* 105(1): 147–152;
- Seapy, R.R. 1990. Patterns of vertical distribution in epipelagic heteropod molluscs off Hawaii. *Marine Ecology Progress Series* 60(3): 235–246;
- Nigro, D.T. 2002. Euthecosomatous pteropods of Hawaiian waters: Faunistic composition and diel patterns of vertical distribution. M.S. Thesis, California State University, Fullerton, CA. 98 pages;
- Cummings, F.A. and R.R. Seapy. 2003. Seasonal abundances of euthecosomatous pteropods and heteropods from waters overlying San Pedro Basin, California. *Veliger* 46(4): 305–313;
- Romanov, E.V. and V.V. Zamorov. 2002. First record of a yellowfin tuna (*Thunnus albacares*) from the stomach of a longnose lancetfish (*Alepisaurus ferox*). *Fishery Bulletin* 100(2): 386–389;
- Moore, J.A., Hartel, K.E., Craddock, J.E. and J.K. Galbraith. 2003. An annotated list of deepwater fishes from off the New England region, with new area records. *Northeastern Naturalist* 10(2): 159–248;
- Galaktionov, G.Z. 1984. Features of the schooling behaviour of the Alfonsina *Beryx splendens* (Berycidae) in the thalassobathyl depths of the Atlantic Ocean. *Journal of Ichthyology* 24(5): 148–151;
- Lehodey, P., Grandperrin, R. and P. Marchal. 1997. Reproductive biology and ecology of a deep-demersal fish, alfonsino *Beryx splendens*, over the seamounts off New Caledonia. *Marine Biology* 128(1): 17–27;
- Leis, J.M. 1982. Nearshore distributional gradients of larval fish (15 taxa) and planktonic crustaceans (6 taxa) in Hawaii. *Marine Biology* 72(1): 89–97;
- Auth, T.D., Brodeur, R.D., and K.M. Fisher. 2007. Diel variation in vertical distribution of an offshore ichthyoplankton community off the Oregon coast. *Fishery Bulletin* 105(3): 313–326;
- Clarke, T.A. and P.J. Wagner. 1976. Vertical distribution and other aspects of the ecology of certain mesopelagic fishes taken near Hawaii. *Fishery Bulletin* 74(3): 635–645;
- Castonguay, M. and J.D. McCleave. 1987. Vertical distributions, diel and ontogenetic vertical migrations and net avoidance of leptocephali of anguilla and other common species in the Sargasso Sea. *Journal of Plankton Research* 9(1): 195–214;
- Kajihara, T., Tsukamoto, K., Otake, T., Mochioka, N., Hasumoto, H. and M. Oya. 1988. Sampling leptocephalus larvae with reference to the diel vertical migration and the gears. *Nippon Suisan Gakkaishi* 54: 941–946;
- Whitehead, P.J.P., Nelson, G.J. and T. Wongratana 1988. FAO species catalogue, Vol. 7, Clupeoid fishes of the world (suborder Clupeoidei). An annotated and illustrated catalogue of the herrings, sardines, pilchards, sprats, shads, anchovies and wolf-herrings. Part 2 - Engraulidae. FAO Fisheries Synopsis, No. 125, 272 pages;
- Carpenter, K.E. and V.H. Niem. 1999. FAO species identification guide for fishery purposes - the living marine resources of the Western Central Pacific. Vol. 3–6;
- Nakamura, I. and N. V. Parin 1993. FAO species catalogue, Vol. 15, Snake mackerels and cutlassfishes of the world (families Gempylidae and Trichiuridae). FAO Fisheries Synopsis. No. 125, 136 pages;
- Clarke, T.A. 1974. Some aspects of the ecology of stomiatoid fishes in the Pacific Ocean near Hawaii. *Fishery Bulletin* 72(2): 337–351;
- Bass, A.L., Dewar, H., Thys, T., Strelman, J., and S.A. Karl. 2005. Evolutionary divergence among lineages of the ocean sunfish family, Molidae (tetraodontiformes). *Marine Biology* 148(2): 405–414;
- Clarke, T.A. 1973. Some aspects of the ecology of lanternfishes (Myctophidae) in the Pacific Ocean near Hawaii. *Fishery Bulletin* 71(2): 401–434;
- Childress, J.J., Price, M.H., Favuzzi, J. and D. Cowles. 1990. Chemical composition of midwater fishes as a function of depth of occurrence off the Hawaiian Islands: Food availability as a selective factor? *Marine Biology* 105(2): 235–246;
- Gartner, J.V., Sulak, K.J., Ross, S.W. and A.M. Necaie. 2008. Persistent near-bottom aggregations of mesopelagic animals along the North Carolina and Virginia continental slopes. *Marine Biology* 153(5): 825–841;
- Clarke, T.A. 1974. Some aspects of the ecology of stomiatoid fishes in the Pacific Ocean near Hawaii. *Fishery Bulletin* 72(2): 337–351;
- Ridge-Cooney, V.L. 1987. Aspects of the ecology of the pelagic hatchetfishes, family Sternoptychidae, in the Pacific Ocean near Hawaii. Ph.D. Thesis, Oceanography. University of Hawaii, Honolulu, HI.
